# Supplementary material
Source: HighWire-hosted journal article supplement (https://jpet.aspetjournals.org/highwire/filestream/150940/field_highwire_adjunct_files/0/1018_supp_fig_1.pdf)
Supplement: 1018_supp_fig_1.pdf [file 1018_supp_fig_1.pdf]

**Title: Resveratrol attenuates HFD-induced hepatic lipotoxicity by up-regulating Bmi-1 expression**

**Authors: Weigang Yuan<sup>#</sup>, Mi Zhang<sup>#</sup>, Chunxu Wang<sup>#</sup>, Bin Li, Lei Li, Feng Ye<sup>\*</sup>, Chuanrui Xu<sup>\*</sup>**

**Manuscript number: JPET-AR-2021-001018**

**Figure S1.**

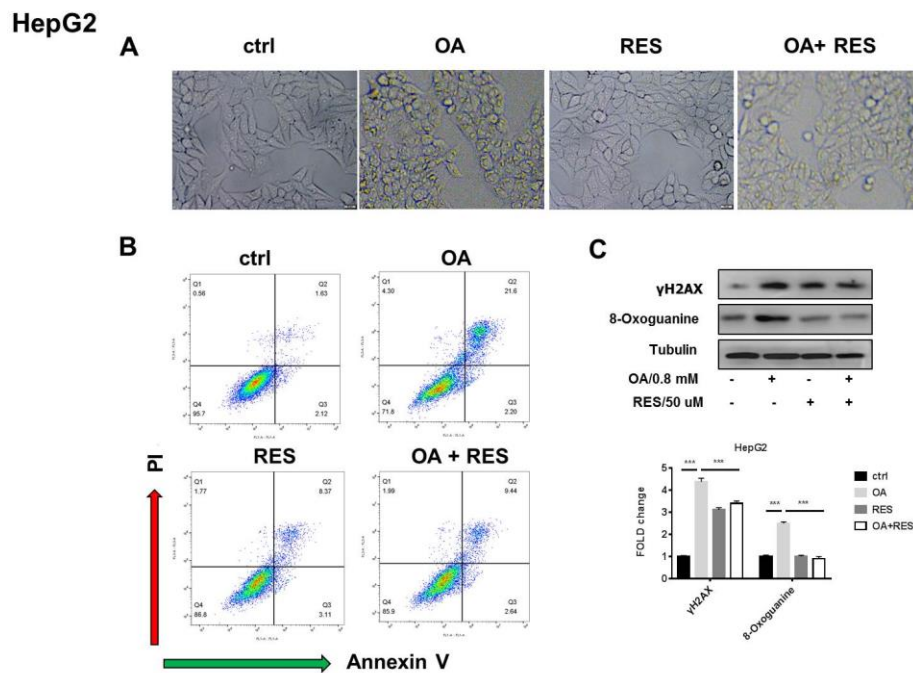

**Supplemental Figure S1. RES attenuated OA-induced cell death and DNA damage in HepG2 cells.** (A) Morphology of HepG2 cells after RES treatment. HepG2 cells were treated with OA (0.8 mM) for 24 h with or without RES cotreatment (50  $\mu$ M). (B) Apoptosis of HepG2 cells treated with OA (0.8 mM) for 24 h with or without RES (50  $\mu$ M). Apoptotic cells were analyzed with a flow cytometry using Annexin-V/PI staining. (C). Levels of  $\gamma$ -H2AX and 8-oxoguanine level in the indicated groups and normalized against tubulin. Data represent mean  $\pm$  SEM (n = 3). \*P < 0.05, \*\*P < 0.01 and\*\*\*P < 0.001.
